# Supplementary material
Source: Springer Nature journal article supplement (https://www.springermedizin.de/resource/supplementary/13058_2014_3422_MOESM5_ESM.pdf/9704134)
Supplement: MOESM5 [file 9704134]

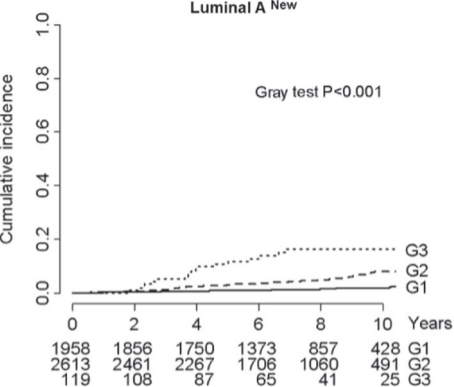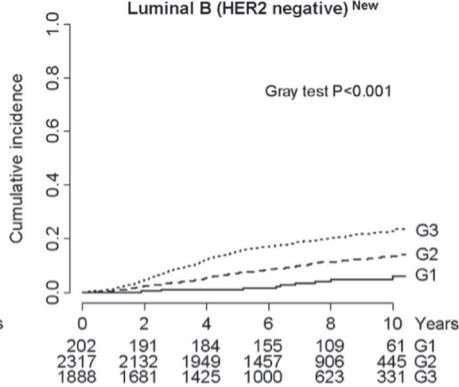

**Patients (10-year cumulative incidence)**

|    | Luminal A <sup>New</sup> | Luminal B <sup>New</sup> |
|----|--------------------------|--------------------------|
| G1 | 1958 ( 1.9%)             | 202 ( 6.0%)              |
| G2 | 2613 ( 7.9%)             | 2317 (13.5%)             |
| G3 | 119 (16.3%)              | 1888 (22.9%)             |

**Hazards Ratio (95% CI)**

|    | Luminal A <sup>New</sup> | Luminal B <sup>New</sup> |
|----|--------------------------|--------------------------|
| G1 | 1.00                     | 2.14 (1.02 to 4.49)      |
| G2 | 2.35 (1.60 to 3.46)      | 4.32 (2.98 to 6.27)      |
| G3 | 5.76 (3.19 to 10.4)      | 6.58 (4.54 to 9.54)      |
